# Supplementary material for: Single-cell analysis of long non-coding RNAs in the developing human neocortex
Source: PubMed Central journal article supplement (PMC4831157; doi:10.1186/s13059-016-0932-1), 2016-04-14
Supplement: 13059_2016_932_MOESM7_ESM.pdf [file 13059_2016_932_MOESM7_ESM.pdf]

Figure S3

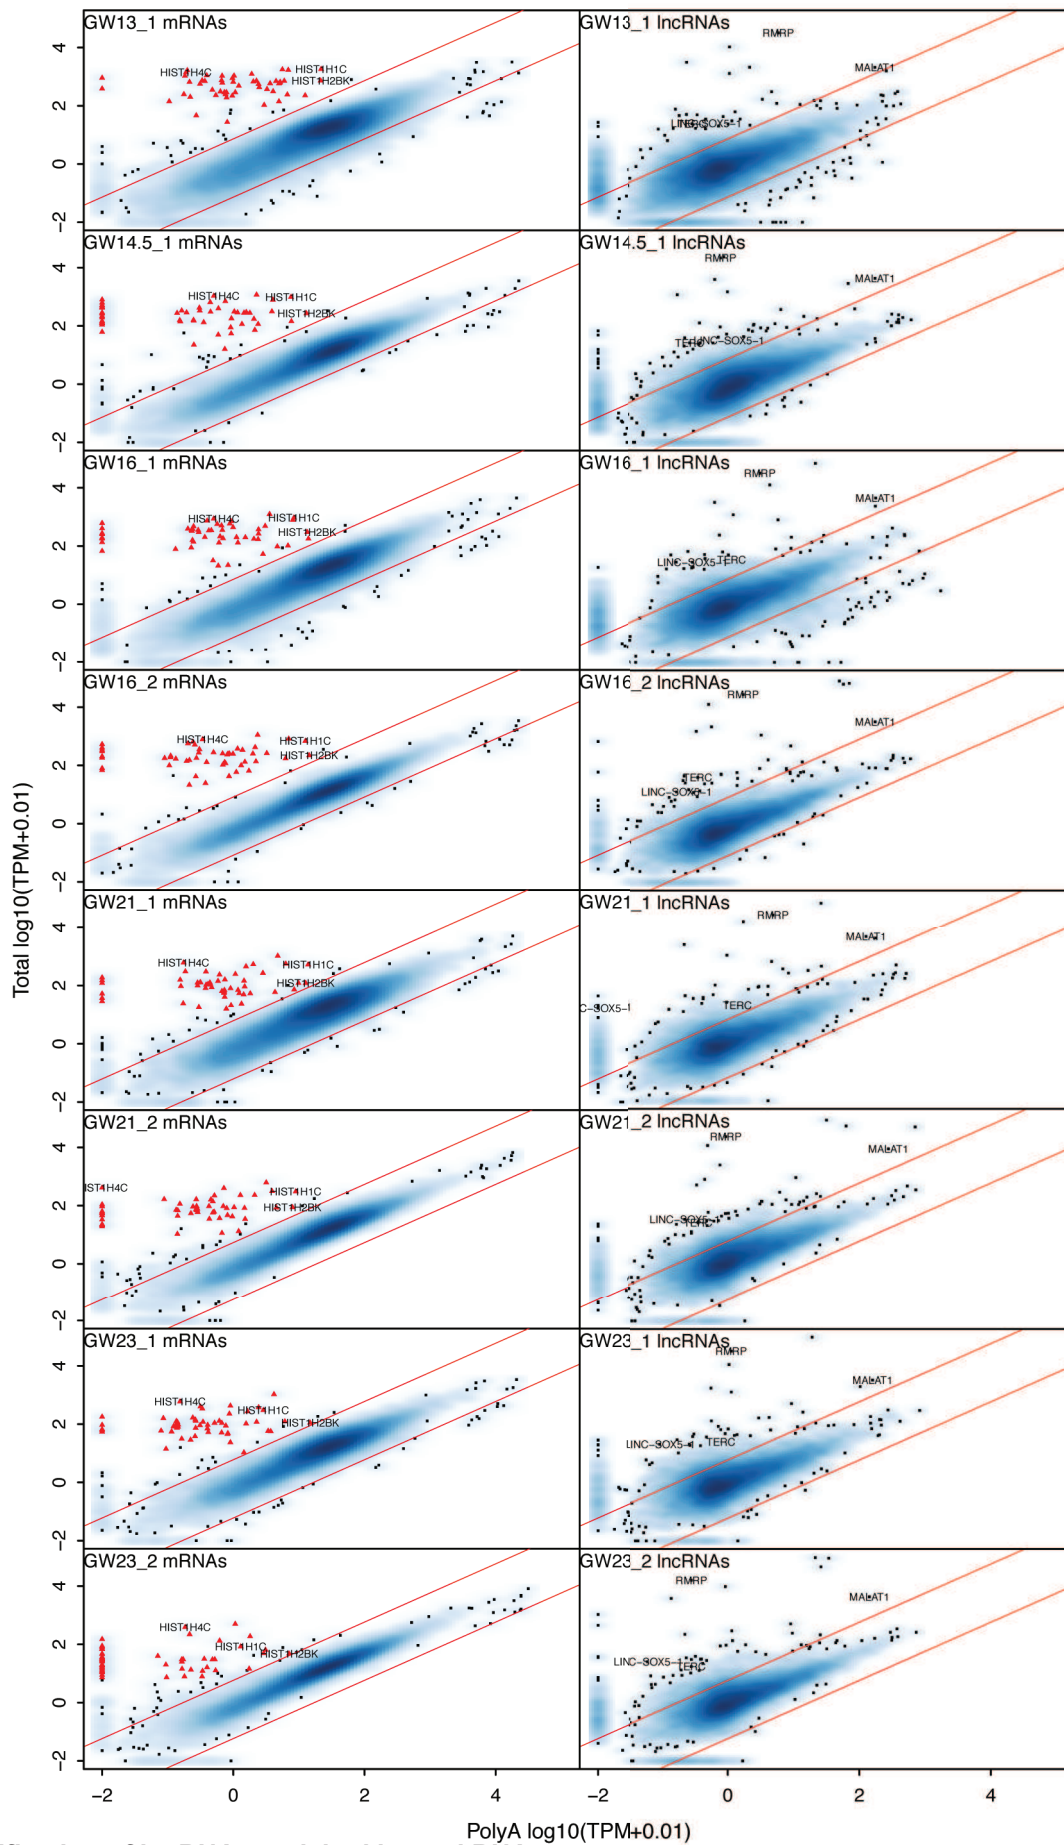

**Figure S3. Identification of lncRNAs enriched in total RNA-seq**

Smooth scatter plot comparisons of mRNA (left) and lncRNA (right) expression levels between polyA RNA-seq and total RNA-seq in all 8 samples. Genes not expressed either polyA or total RNA-seq were omitted. 58 mRNAs and 85 lncRNAs were consistently > 10 fold enriched in total RNA-seq across all samples. Only one gene, *NDUFC2-KCTD14*, was identified as consistently enriched in the polyA selected RNA-seq. Red diagonals represent 10 fold enrichment in either total (upper) or polyA (lower) fractions. Red triangles, histone subunits enriched > 10 fold in total RNA. TPM, Transcripts per Million.
