# Supplementary material for: Single-cell analysis of long non-coding RNAs in the developing human neocortex
Source: PubMed Central journal article supplement (PMC4831157; doi:10.1186/s13059-016-0932-1), 2016-04-14
Supplement: 13059_2016_932_MOESM13_ESM.pdf [file 13059_2016_932_MOESM13_ESM.pdf]

Figure S7

Endothelial  
Radial Glia  
Dividing R.G.  
Intermediate Progenitor  
Newborn Neuron  
Maturing Neuron  
Interneuron

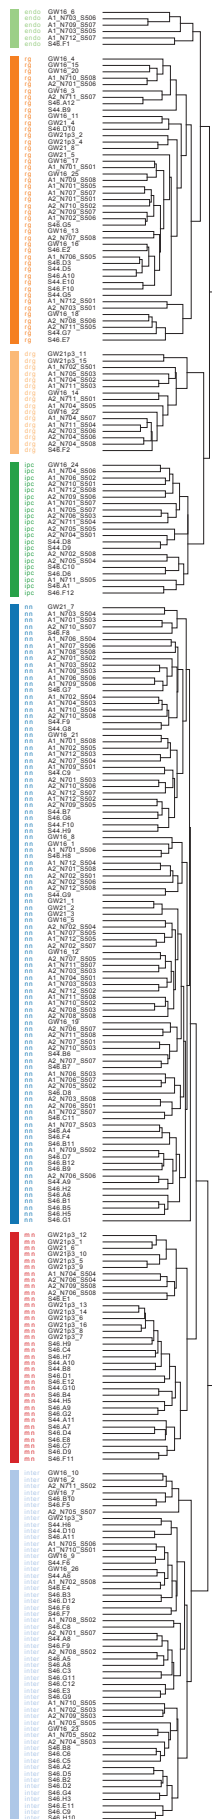

**Figure S7. Hierarchical Clustering of Neocortex Single Cells**  
Results of complete linkage hierarchical clustering of 276 neocortex single cells, using the top 500 genes ranked by the highest absolute values of gene loading scores across the first four principal components following PCA. Endo, endothelial. RG, radial glia. DRG, dividing radial glia. IPC, intermediate progenitor cell. NN, newborn neurons. MN, maturing neurons. INTER, interneurons.
