# Supplementary material for: Single-cell analysis of long non-coding RNAs in the developing human neocortex
Source: PubMed Central journal article supplement (PMC4831157; doi:10.1186/s13059-016-0932-1), 2016-04-14
Supplement: 13059_2016_932_MOESM16_ESM.pdf [file 13059_2016_932_MOESM16_ESM.pdf]

Figure S9

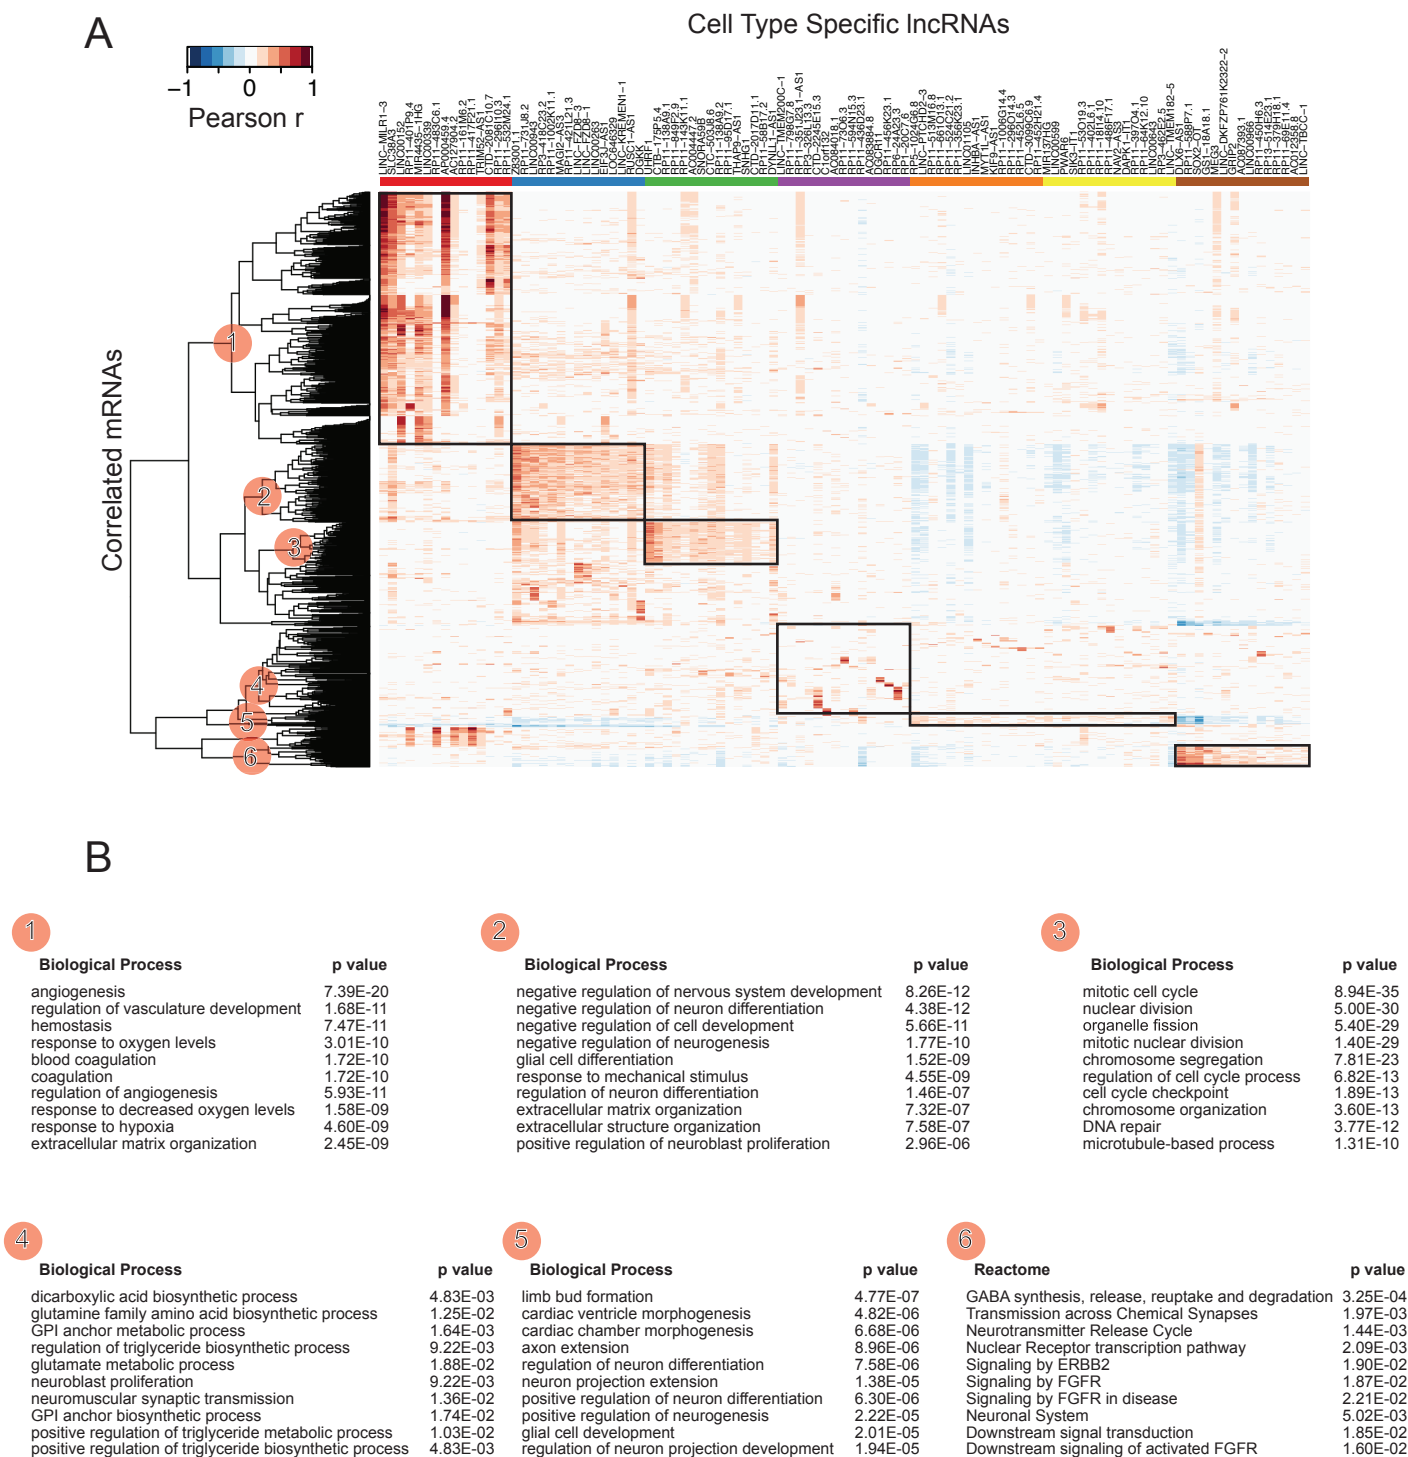

**Figure S9. Gene co-expression analysis of cell type-specific lncRNAs in single cells**

A) Matrix of Pearson correlation coefficients between cell type-specific lncRNAs and the top 10% most correlated or anticorrelated mRNAs across single cells. B) Gene ontology terms for gene clusters identified in the correlation matrix. Cluster nodes are labeled with red circles. Header bar colors for lncRNAs: red, endothelial. blue, radial glia. green, dividing radial glia. purple, intermediate progenitor cell. orange, newborn neurons. yellow, maturing neurons. brown, interneurons.
