# Supplementary material for: Single-cell analysis of long non-coding RNAs in the developing human neocortex
Source: PubMed Central journal article supplement (PMC4831157; doi:10.1186/s13059-016-0932-1), 2016-04-14
Supplement: 13059_2016_932_MOESM17_ESM.pdf [file 13059_2016_932_MOESM17_ESM.pdf]

Figure S10

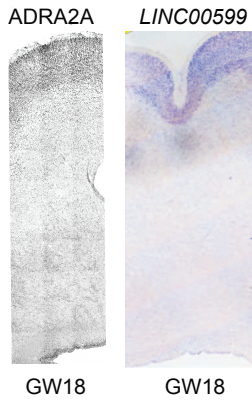

**Figure S10. Immunohistochemistry of maturing neuron marker ADRA2A**

Immunohistochemistry of maturing neuron marker protein ADRA2A (left) compared to in situ hybridization against maturing neuron lncRNA LINC00599 (right, reproduced from Figure 5).
